# Supplementary material for: Biofuel purification by pervaporation and vapor permeation in metal–organic frameworks: a computational study
Source: Royal Society of Chemistry journal article supplement (doi:10.1039/c0ee00630k), 2011-01-01
Supplement: c0ee00630k.pdf [file c0ee00630k.pdf]

## Electronic Supplementary Information

### Biofuel Purification by Pervaporation and Vapor Permeation in Metal–Organic Frameworks: A Computational Study

A. Nalaparaju, X. S. Zhao, and J. W. Jiang\*

Department of Chemical and Biomolecular Engineering, National University of Singapore, 117576, Singapore

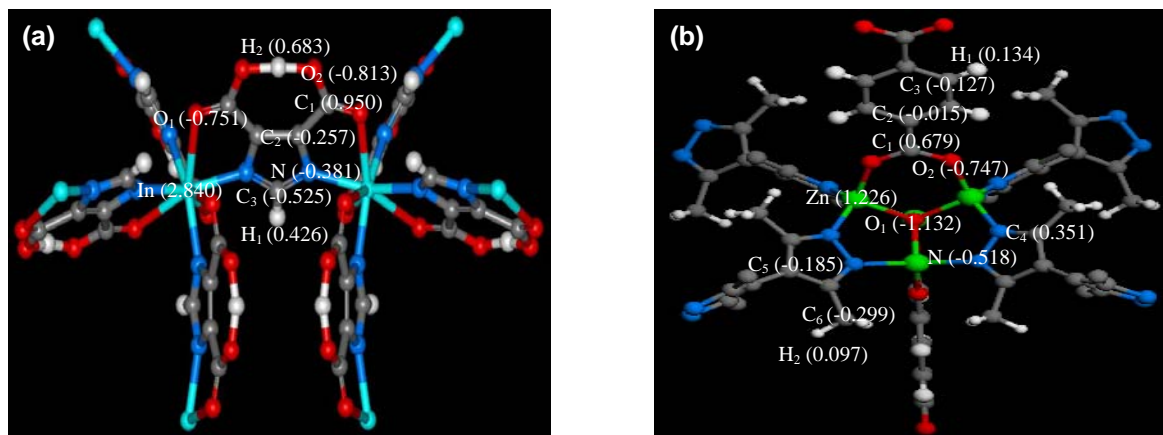

**Figure S1.** Atomic charges in the fragmental clusters of (a) *rho*-ZMOF and (b) Zn<sub>4</sub>O(bdc)(bpz)<sub>2</sub>. Color code: In, cyan; Zn, green; N, blue; C, grey; O, red; and H, white.

| Atom | $\sigma$ (Å) | $\epsilon$ (kJ/mol) |
|------|--------------|---------------------|
| In   | 3.976        | 2.504               |
| Zn   | 2.461        | 0.519               |
| N    | 3.260        | 0.288               |
| O    | 3.118        | 0.251               |
| C    | 3.431        | 0.439               |
| H    | 2.571        | 0.184               |
| Na   | 15.10        | 2.658               |

**Table S1.** Lennard-Jones potential parameters of the framework atoms in Na-*rho*-ZMOF and Zn<sub>4</sub>O(bdc)(bpz)<sub>2</sub>.

**Table S2.** Potential parameters of adsorbates (water, methanol and ethanol).

| Adsorbates | LJ parameters and Charges |              |                    |         | Bond stretching                                  | Bond bending                                                     |
|------------|---------------------------|--------------|--------------------|---------|--------------------------------------------------|------------------------------------------------------------------|
|            | Site                      | $\sigma$ (Å) | $\epsilon/k_B$ (K) | $q$ (e) |                                                  |                                                                  |
| water      | O                         | 3.151        | 76.47              | -0.834  | $r_{\text{H-O}} = 0.96 \text{ \AA}$              | $\theta_{\angle\text{H-O-H}} = 104.52^\circ$                     |
|            | H                         | 0            | 0                  | +0.417  | $k_b/k_B = 533020.66 \text{ K}$                  | $k_\theta/k_B = 34264.61 \text{ K}$                              |
| methanol   | CH <sub>3</sub>           | 3.75         | 98.0               | +0.265  | $r_{\text{CH}_3\text{-O}} = 1.43 \text{ \AA}$    | $\theta_{\angle\text{CH}_3\text{-O-H}} = 108.5^\circ$            |
|            | O                         | 3.02         | 93.0               | -0.700  | $r_{\text{O-H}} = 0.945 \text{ \AA}$             | $k_\theta/k_B = 55400 \text{ K}$                                 |
|            | H                         | 0            | 0                  | +0.435  |                                                  |                                                                  |
| ethanol    | CH <sub>3</sub>           | 3.75         | 98.0               | 0       | $r_{\text{CH}_3\text{-CH}_2} = 1.54 \text{ \AA}$ | $\theta_{\angle\text{CH}_3\text{-CH}_2\text{-O}} = 109.47^\circ$ |
|            | CH <sub>2</sub>           | 3.95         | 46.0               | +0.265  | $r_{\text{CH}_2\text{-O}} = 1.43 \text{ \AA}$    | $k_\theta/k_B = 50400 \text{ K}$                                 |
|            | O                         | 3.02         | 93.0               | -0.700  | $r_{\text{O-H}} = 0.945 \text{ \AA}$             | $\theta_{\angle\text{CH}_2\text{-O-H}} = 108.5^\circ$            |
|            | H                         | 0            | 0                  | +0.435  |                                                  | $k_\theta/k_B = 55400 \text{ K}$                                 |

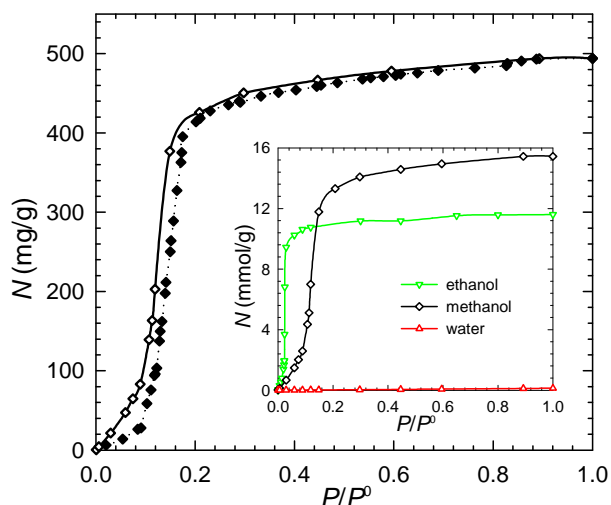

**Figure S2.** Adsorption isotherms of methanol in  $\text{Zn}_4\text{O}(\text{bdc})(\text{bpz})_2$  at 298 K. The open diamonds are the simulation results of this work, and the filled diamonds are experimental data (Hou et al. *Inorg. Chem.* 2008, 47, 1346). Good agreement between the simulation and experimental results. The inset shows the isotherms of single-component ethanol, methanol and water.

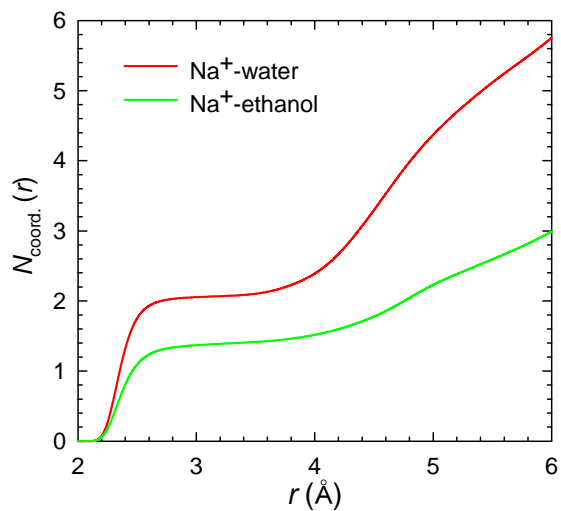

**Figure S3.** Coordination numbers of water and ethanol around  $\text{Na}^+$  ions for water/ethanol mixture (10:90) at PV condition in Na-*rho*-ZMOF.

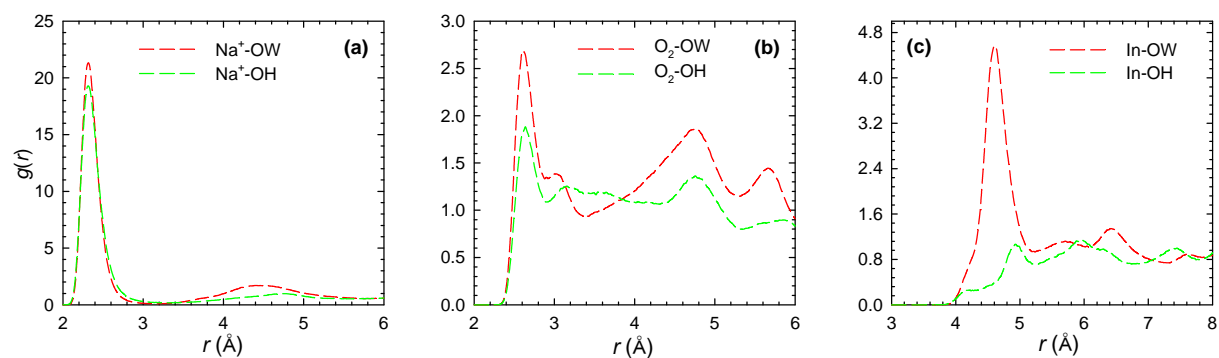

**Figure S4.** Radial distribution functions of (a)  $\text{Na}^+$ -OW (OH), (b)  $\text{O}_2$ -OW (OH), and (c) In-OW (OH) for water/ethanol mixture (10:90) at PV condition in Na-*rho*-ZMOF. OW and OH are the oxygen atoms in water and ethanol, respectively.

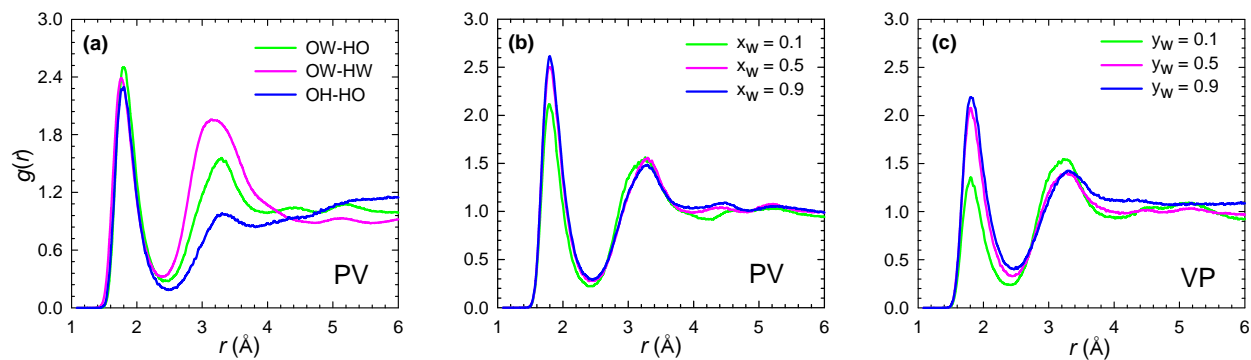

**Figure S5.** Radial distribution functions of (a)  $O_{\text{water}}-H_{\text{ethanol}}$ ,  $O_{\text{water}}-H_{\text{water}}$  and  $O_{\text{ethanol}}-H_{\text{ethanol}}$  for water/ethanol equimolar mixture at PV condition. (b)  $O_{\text{water}}-H_{\text{ethanol}}$  at PV condition and (c)  $O_{\text{water}}-H_{\text{ethanol}}$  at VP condition with various feed compositions in Na-*rho*-ZMOF.

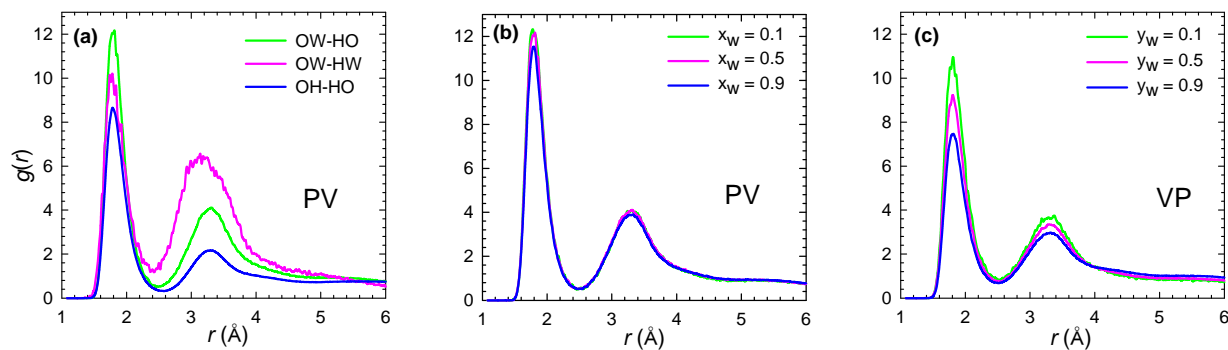

**Figure S6.** Radial distribution functions of (a)  $O_{\text{water}}-H_{\text{ethanol}}$ ,  $O_{\text{water}}-H_{\text{water}}$  and  $O_{\text{ethanol}}-H_{\text{ethanol}}$  for water/ethanol equimolar mixture at PV condition. (b)  $O_{\text{water}}-H_{\text{ethanol}}$  at PV condition and (c)  $O_{\text{water}}-H_{\text{ethanol}}$  at VP condition with various feed compositions in  $Zn_4O(bdc)(bpz)_2$ .

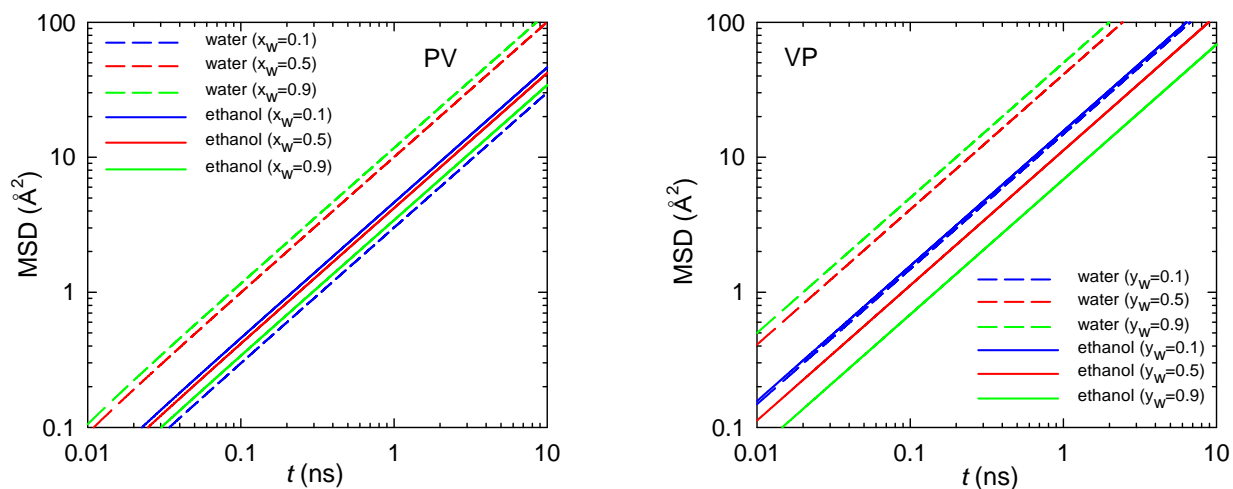

**Figure S7.** Mean-squared displacements for water/ethanol mixtures in Na- $\rho$ -ZMOF with various feed compositions.

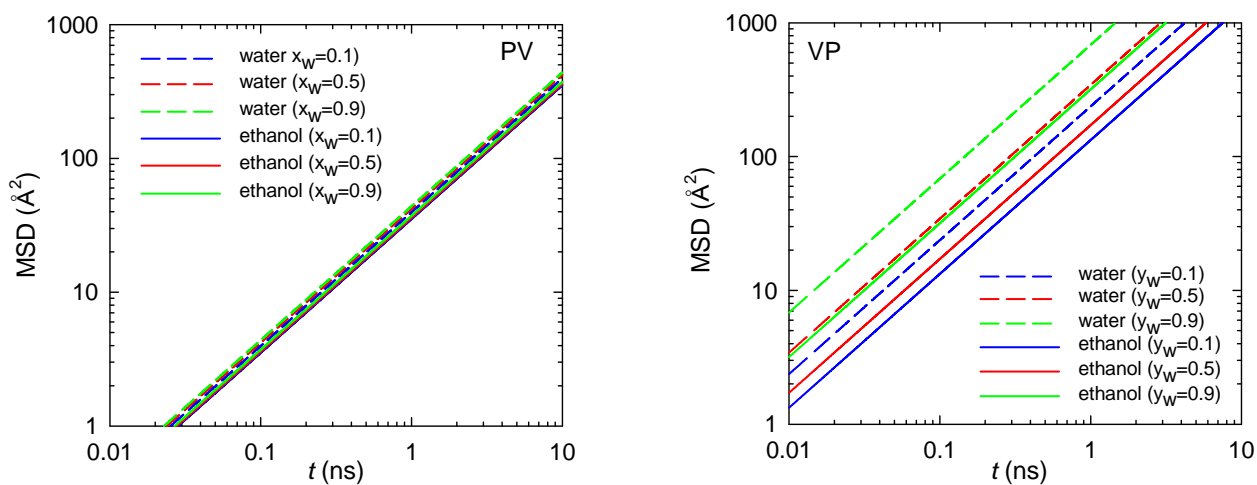

**Figure S8.** Mean-squared displacements for ethanol/water mixtures in  $\text{Zn}_4\text{O}(\text{bdc})(\text{bpz})_2$  with various feed compositions.
